# Supplementary material for: Tunnel barrier engineering of spin-polarized mild band gap vertical ternary heterostructures
Source: Royal Society of Chemistry journal article supplement (doi:10.1039/d1cp02051j), 2021-01-01
Supplement: d1cp02051j1.pdf [file d1cp02051j1.pdf]

**The EXCHANGE INTERACTIONS DEFINED FINE DETAILS of ATOMIC STRUCTURE of  
CrI<sub>3</sub>/g-C<sub>3</sub>N<sub>4</sub> VERTICAL HETEROSTRUCTURES for PERSPECTIVE SPIN-POLARIZED  
PHOTOVOLTAICS**

Iu. Melchakova and P. Avramov

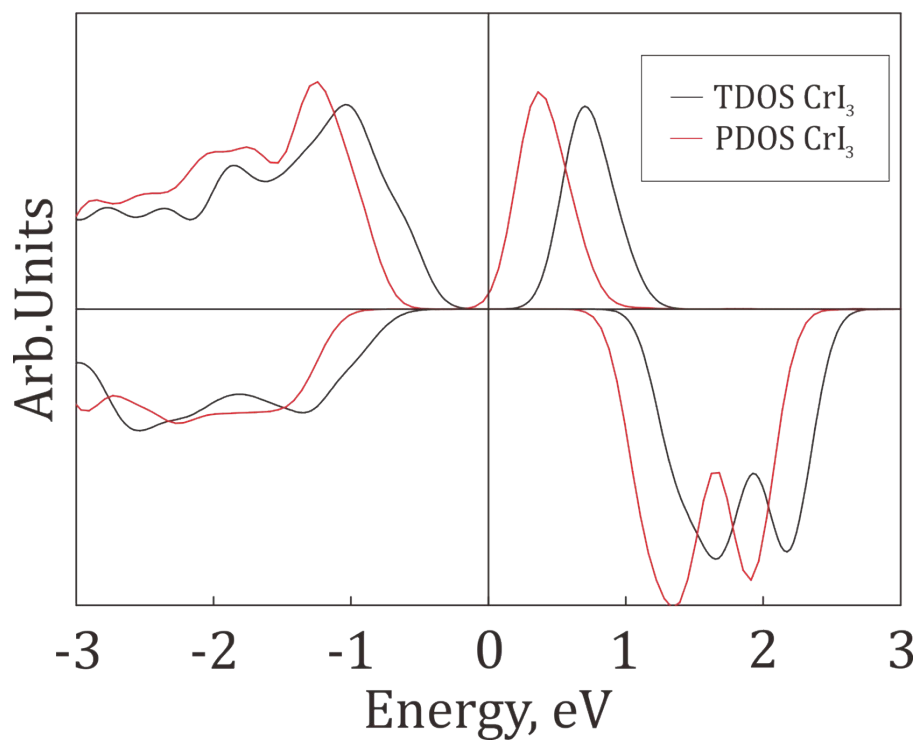

**Figure S1.** The TDOS of free-standing CrI<sub>3</sub> (black), the PDOS of CrI<sub>3</sub> fragment (red) as a part of CrI<sub>3</sub>/g-CN<sub>2</sub>/CrI<sub>3</sub> FM heterostructure.

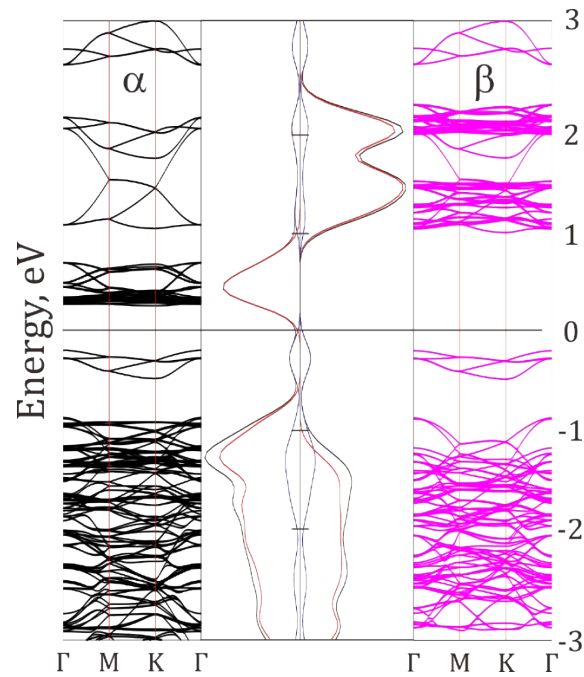

**Figure S2.** The  $\text{CrI}_3/\text{g-CN}_2/\text{CrI}_3$  FM densities of states (middle) and band structure for spin up (right panel) and spin down (left panel) channels. Total DOS is depicted in black, partial DOS of  $\text{CrI}_3$  is depicted in red, partial DOS of  $\text{g-CN}_2$  is depicted in blue.

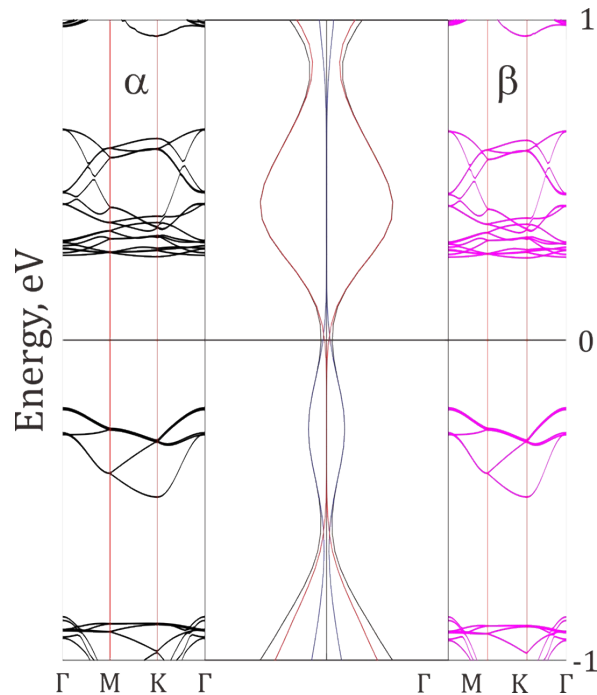

**Figure S3.** The  $\text{CrI}_3/\text{g-CN}_2/\text{CrI}_3$  AFM densities of states distribution (DOS) (middle) and band structure for spin up (right panel) and spin down (left panel) channels. Total DOS are depicted in black, partial DOS of  $\text{CrI}_3$  are depicted in red, partial DOS of  $\text{g-CN}_2$  are depicted in blue
